# Supplementary material for: Association of Inferior Vena Cava Filter Placement With Rates of Pulmonary Embolism in Patients With Cancer and Acute Lower Extremity Deep Venous Thrombosis
Source: PubMed Central journal article supplement (PMC7378756; doi:10.1001/jamanetworkopen.2020.11079), 2020-07-23

## Supplementary Online Content

Balabhadra S, Kuban JD, Lee S, et al. Association of inferior vena cava filter placement with rates of pulmonary embolism in patients with cancer and acute lower extremity deep venous thrombosis. *JAMA Netw Open*. 2020;3(7):e2011079. doi:10.1001/jamanetworkopen.2020.11079

**eTable.** ICD-9 and CPT codes

**eFigure 1.** Histogram and Density Plot of the Time Intervals From the Initial Hospital Encounter in Which the Diagnosis of Deep Venous Thrombosis (DVT) Was Made to the Subsequent Hospital Encounter in Which the Patient Presented With a New Pulmonary Embolism (PE)

**eFigure 2.** A Love Plot of Standardized Mean Differences for Covariates Used in Propensity Score Matching Demonstrates Excellent Balance for All Covariates Following the Matching Algorithm

**eFigure 3.** Bar Chart of Cancer Histologies Within the Study Cohort

**eFigure 4.** Recurrent DVT-Free Survival Was Improved Rather Than Worsened in the IVC Filter Placement Group

This supplementary material has been provided by the authors to give readers additional information about their work.

**eTable. ICD-9 and CPT codes**

|                                | <i>ICD-9</i> diagnostic code                                                                                          | <i>ICD-9</i> procedure code | <i>CPT</i> code                         |
|--------------------------------|-----------------------------------------------------------------------------------------------------------------------|-----------------------------|-----------------------------------------|
| <b>IVCF</b>                    |                                                                                                                       |                             |                                         |
| IVC filter placement           |                                                                                                                       | 38.7                        | 37620 (before 2012), 37191 (after 2012) |
|                                |                                                                                                                       |                             |                                         |
| <b>DVT and PE</b>              |                                                                                                                       |                             |                                         |
| Pulmonary embolism             | 415.1, 415.11, 415.13, 415.19                                                                                         |                             |                                         |
| DVT (acute, lower extremity)   | 453.2, 453.40, 453.41, 453.42                                                                                         |                             |                                         |
|                                |                                                                                                                       |                             |                                         |
| <b>Comorbidities</b>           |                                                                                                                       |                             |                                         |
| Intracranial hemorrhage        | 430, 431, 432.x, 852.2, 852.4, 853.0                                                                                  |                             |                                         |
| Upper GI bleed                 | 531.0, 531.2, 531.4, 531.6, 532.0, 532.2, 532.4, 532.6, 533.0, 533.2, 533.4, 533.6, 534.0, 534.2, 534.4, 534.6, 578.0 |                             |                                         |
| Lower GI bleed                 | 562.02, 562.03, 562.13, 569.3, 569.85, 578.1, 578.9                                                                   |                             |                                         |
| Hematuria                      | 599.7                                                                                                                 |                             |                                         |
| Proximal DVT                   | 453.41                                                                                                                |                             |                                         |
| Metastatic disease             | 196.0 – 199.1, 209.70 – 209.75, 209.79, 789.51                                                                        |                             |                                         |
| Coagulopathy                   | 286.0 – 286.9, 287.1, 287.3 – 287.5, 649.30 – 649.34, 289.84                                                          |                             |                                         |
|                                |                                                                                                                       |                             |                                         |
| <b>Cancer types</b>            |                                                                                                                       |                             |                                         |
| Lung cancer                    | 160.x, 161.x, 162.x, 163.x, 164.x, 165.x                                                                              |                             |                                         |
| Breast cancer                  | 174.x, 175.x                                                                                                          |                             |                                         |
| Renal cancers                  | 189.x                                                                                                                 |                             |                                         |
| Prostate cancer                | 185.x                                                                                                                 |                             |                                         |
| Gynecologic cancers            | 179.x, 180.x, 181.x, 182.x, 183.x, 184.x, 187.x                                                                       |                             |                                         |
| Bladder cancer                 | 188.x                                                                                                                 |                             |                                         |
| Thyroid cancer                 | 193.x, 194.x                                                                                                          |                             |                                         |
| Gastrointestinal tract cancers | 150.x, 151.x, 152.x, 153.x, 154.x                                                                                     |                             |                                         |
| Pancreaticobiliary cancers     | 155.x, 156.x, 157.x                                                                                                   |                             |                                         |
| Lymphoma/leukemia              | 200.x, 201.x, 202.x, 203.x, 204.x, 205.x, 206.x, 207.x, 208.x                                                         |                             |                                         |
| Neuroendocrine cancers         | 209.x                                                                                                                 |                             |                                         |
| Melanoma                       | 172.x                                                                                                                 |                             |                                         |
| Head/neck cancers              | 140.x, 141.x, 142.x, 143.x, 144.x, 145.x, 146.x, 147.x, 148.x, 149.x                                                  |                             |                                         |
| Sarcoma                        | 170.x, 171.x, 175.x                                                                                                   |                             |                                         |
| Brain cancers                  | 191.x, 192.x                                                                                                          |                             |                                         |

**eFigure 1.** Histogram and Density Plot of the Time Intervals From the Initial Hospital Encounter in Which the Diagnosis of Deep Venous Thrombosis (DVT) Was Made to the Subsequent Hospital Encounter in Which the Patient Presented With a New Pulmonary Embolism (PE)

Most new PE events occurred within the first 90 days following the DVT diagnosis.

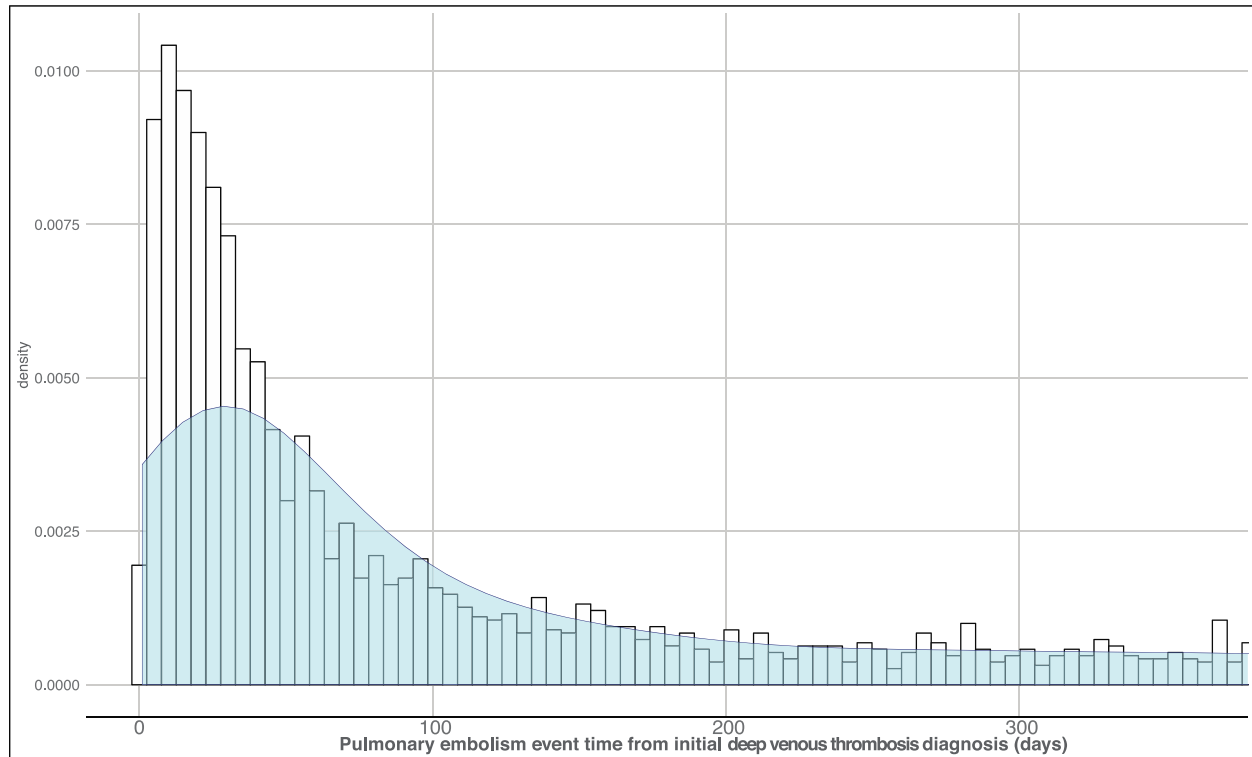

**eFigure 2.** A Love Plot of Standardized Mean Differences for Covariates Used in Propensity Score Matching Demonstrates Excellent Balance for All Covariates Following the Matching Algorithm

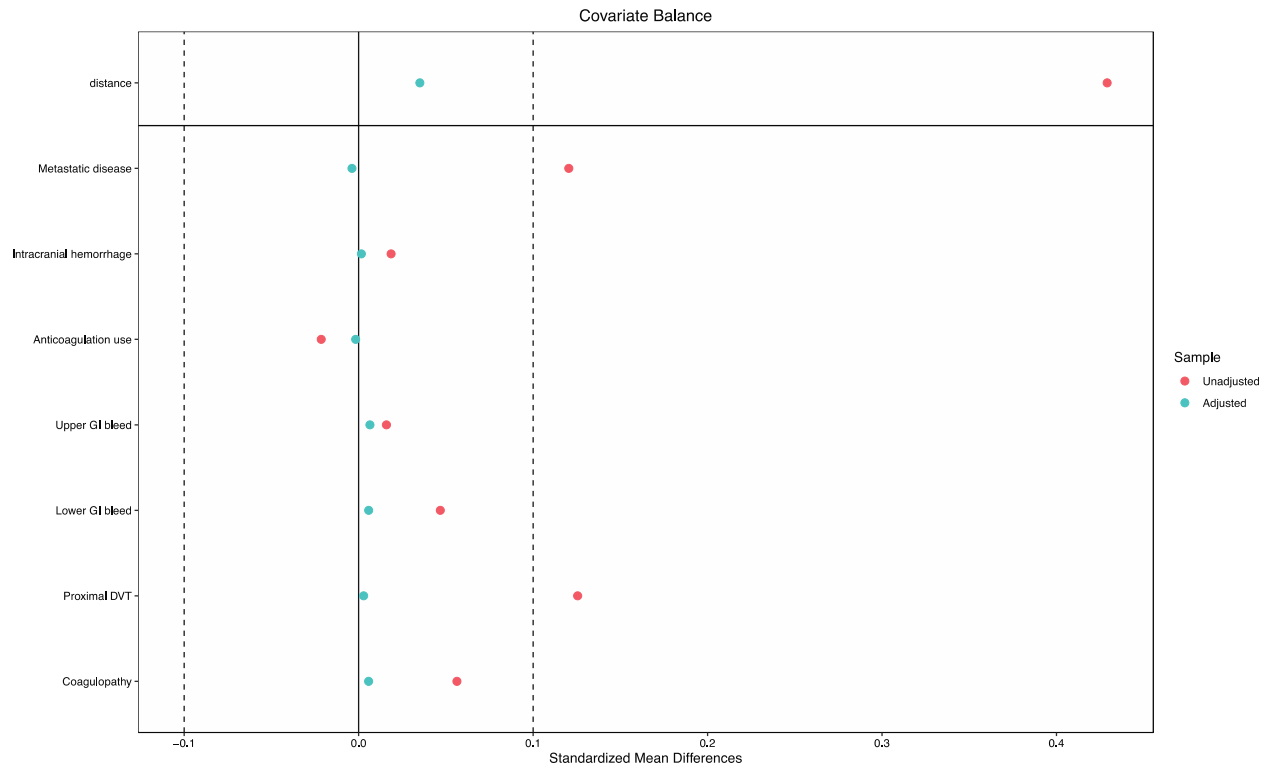

**eFigure 3.** Bar Chart of Cancer Histologies Within the Study Cohort

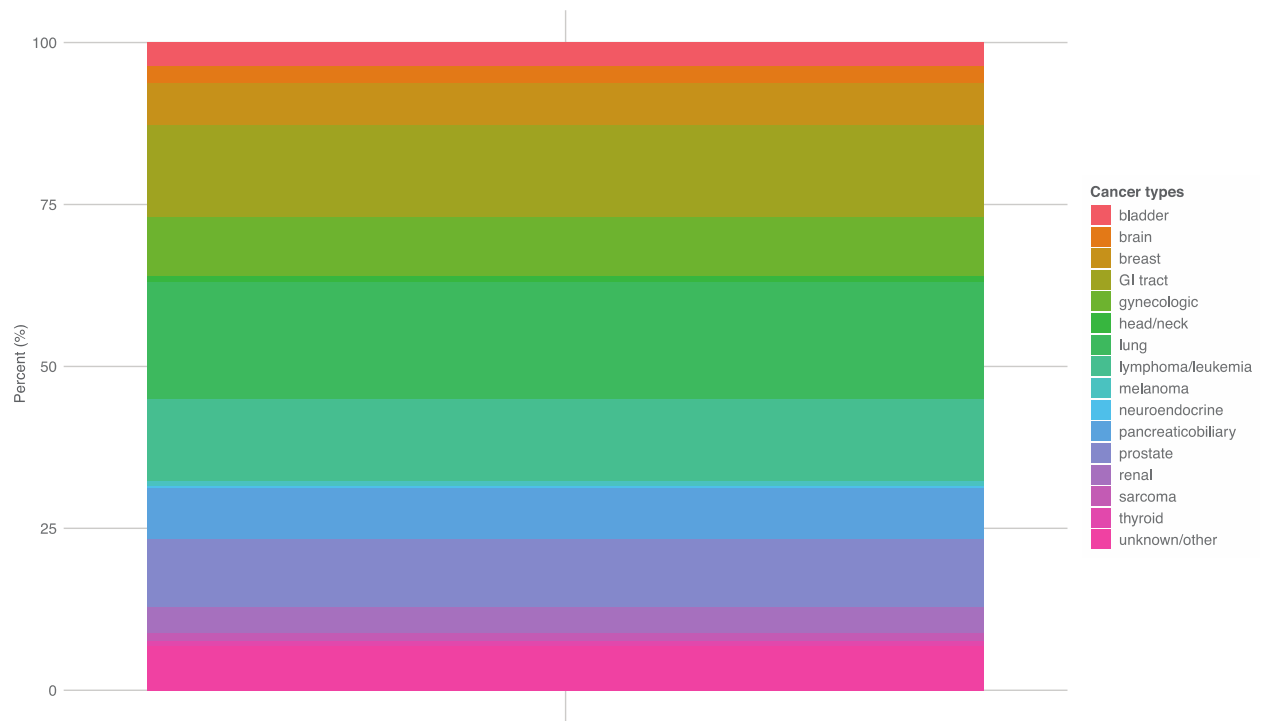

**eFigure 4.** Recurrent DVT-Free Survival Was Improved Rather Than Worsened in the IVC Filter Placement Group

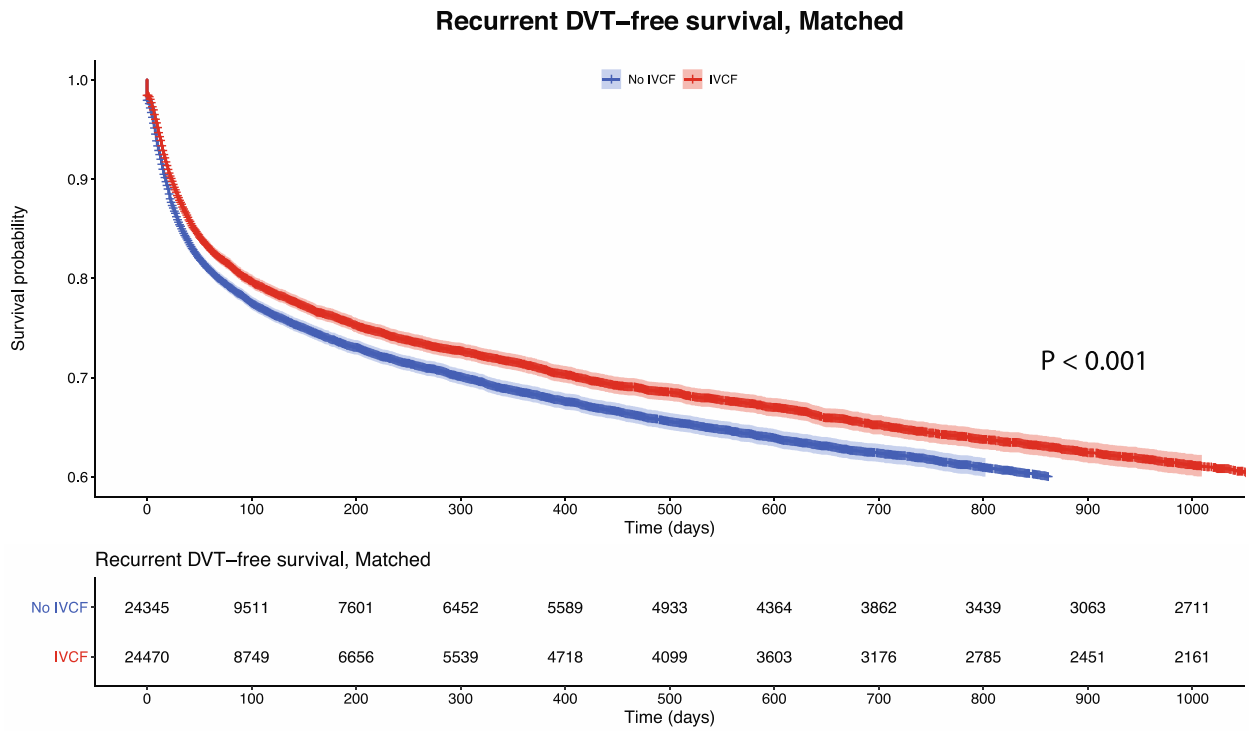

Supplement: jamanetwopen-3-e2011079-s001.pdf [file jamanetwopen-3-e2011079-s001.pdf]
